# Supplementary material
Source: PubMed Central journal article supplement (PMC3069554)
Supplement: NIHMS281918-supplement-supplemental_data.pdf [file NIHMS281918-supplement-supplemental_data.pdf]

# Supporting Information

## Potent Agonists of the Protease Activated Receptor 2 (PAR<sub>2</sub>)

*Scott Boitano,<sup>‡#</sup> Andrea N. Flynn,<sup>‡#</sup>, Stephanie M. Schulz,<sup>‡#</sup> Justin Hoffman,<sup>‡#</sup> Theodore J. Price,<sup>†</sup> and  
Josef Vagner<sup>#\*</sup>*

<sup>‡</sup>Arizona Respiratory Center and Department of Physiology, University of Arizona, 1501 N. Campbell Ave., Tucson, AZ 85724.

<sup>#</sup> The BIO5 Research Institute, University of Arizona, 1657 E Helen Street, Tucson, AZ 85721.

<sup>†</sup> Department of Pharmacology, University of Arizona, 1501 N. Campbell Ave. Tucson, AZ 85724.

### Contents:

|                                                                           |    |
|---------------------------------------------------------------------------|----|
| 1. General methods                                                        | S2 |
| 2. Solid-phase Synthesis                                                  | S2 |
| 3. Structures                                                             | S4 |
| 4. Mass spectral data and HPLC                                            | S5 |
| 5. Ca <sup>2+</sup> mobilization and in vitro physiological (RTCA) assays | S6 |
| 6. References                                                             | S7 |

## **General methods:**

### Chemical Materials:

*N*- $\alpha$ -Fmoc-protected amino acids, HBTU, HCTU, HOCT and HOBt were purchased from SynPep (Dublin, CA) or from Novabiochem (San Diego, CA). Rink amide Tentagel S and R resins were acquired from Rapp Polymere (Tubingen, Germany). For the *N*- $\alpha$ -Fmoc-protected amino acids, the following side chain protecting groups were used: Arg(*N*<sup>g</sup>-Pbf); Lys(*N*<sup>ε</sup>-Aloc). Reagent grade solvents, reagents, and acetonitrile for HPLC were acquired from VWR (West Chester, PA) or Aldrich-Sigma (Milwaukee, WI), and were used without further purification unless otherwise noted. *N*-terminal heterocyclic acids were obtained from Sigma-Aldrich or TCI. The solid-phase synthesis was performed in fritted syringes using a Domino manual synthesizer obtained from Torviq (Niles, MI).

### General Synthesis:

All reactions were conducted under Ar atmosphere using oven-dried glassware. All chemicals were obtained from commercial sources and used without further purification. <sup>1</sup>H NMR spectra were recorded on a Bruker-DRX-300 MHz instrument with chemical shifts reported relative to TMS (0.0 ppm) and residual DMSO (2.50 ppm). Proton-decoupled <sup>13</sup>C NMR spectra were referenced to CDCl<sub>3</sub> (77.0 ppm) as well as DMSO (39.51 ppm). Low resolution mass spectra were obtained on AGILENT (HP) MDS 1100 using AP-ESI. High resolution mass spectra (HRMS) were recorded on a JEOL HX110A instrument. Melting points were measured using a Thomas Hoover capillary melting point apparatus and are uncorrected.

### Solid-phase Synthesis Fmoc-LIGRL-Rink resin:

Ligands were prepared as previously published by solid-phase synthesis as summarized in Scheme S1 on Rink Amide Tentagel resin (0.23 mmol/g) using a Fmoc/*t*Bu synthetic strategy and standard DIC activation.<sup>[1,2]</sup> *N*<sup>α</sup>-Fmoc amino acid was double coupled using preactivated 0.3 M HOBt esters and HCTU/2,4,6-collidine couplings.

The Rink resin was washed with DMF, and the *N*<sup>α</sup>-Fmoc protecting group was removed with 1:10 piperidine in DMF (1 × 2 min and 1 × 20 min). The resin was washed successively with DMF, DCM, DMF, a solution of 0.05 mM solution of Bromophenol Blue in 0.2 M HOBt in DMF, then DMF. The *N*<sup>α</sup>-Fmoc amino acid was coupled using pre-activated 0.3 M HOBt or HOCT esters in DMF-DCM mixture (3 equiv of *N*<sup>α</sup>-Fmoc amino acid, 3 equiv of HOBt or HOCT, and 3 equiv of DIC). The resin slurry was stirred for 2 h or until the bromophenol test became negative.<sup>[3]</sup> If the test failed, the resin was washed with DMF and the amino acid was coupled again by the HCTU/2,4,6-lutidine procedure (0.3 M solution of 3 equiv of *N*<sup>α</sup>-Fmoc amino acid, 3 equiv of HCTU, and 6 equiv of 2,4,6-lutidine in DMF) for 3 h or by a preformed symmetric anhydride (3 equiv of *N*<sup>α</sup>-Fmoc amino acid and 1.5 equiv of DIC in a 1:1 DMF-DCM mixture) until Kaiser test was negative. If the couplings did not result in a negative Kaiser test, the resin was washed with DMF, and the free amino groups were capped with 50% acetic anhydride in pyridine for 10 minutes. After all coupling sequentially to the Rink amide resin, the resin was washed with DCM, dried under vacuum, and then stored in refrigerator.

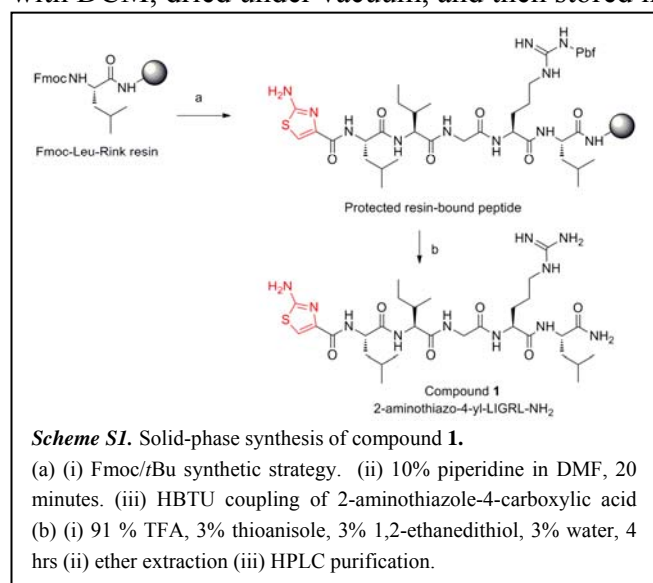

### Solid-phase Synthesis of compound 1, (Scheme S1)

An aliquot of the dry protected Fmoc-LIGRL-Rink resin (10 μmol, from previous step) was placed in a 2 mL syringe reactor. The resin was swelled in DCM for an hour. The Fmoc protecting group was deprotected by 10% piperidine in DMF. The deprotected resin was washed with DMF (3X), 0.2 M

HOBt in DMF (2X), and DMF (2X0. The free amine N-terminus was coupled using 3 equiv of 2-aminothiazole-4-carboxylic acid by the HBTU/2,4,6-lutidine procedure (0.3 M solution of 3 equiv of acid, 3 equiv of HBTU, and 6 equiv of 2,4,6-lutidine in DMF) overnight. The final resin was washed thoroughly with DMF (3x) and DCM (7x) then cleaved. A cleavage cocktail (10 mL per 1 g of the resin) consisting of CF<sub>3</sub>CO<sub>2</sub>H (91%), H<sub>2</sub>O (3%), EDT (3%), and TA (3%) was injected into the resin and the mixture was agitated at room temperature for 4 h. The solution was filtered, the resin was washed with CF<sub>3</sub>CO<sub>2</sub>H (2 × 3 min), the liquid phases were collected and concentrated under a stream of nitrogen, and the product was precipitated using cold Et<sub>2</sub>O. The crude product was washed three times with cold Et<sub>2</sub>O, lyophilized, purified, and characterized as described above. The pure compounds were dissolved in DI water or DMSO at approximately 1-5 mM concentrations and concentration was determined by Trp-HPLC measurement<sup>[4,5]</sup>.

#### **QC and purification:**

The purity of products was checked by analytical PR-HPLC using a Waters Alliance 2695 Separation Model with a Waters 2487 dual wavelength detector (220 and 280 nm) on a reverse phase column (Waters Symmetry C18, 4.6 × 75 mm, 3.5 μm). Peptides were eluted with a linear gradient of aqueous CH<sub>3</sub>CN/0.1% CF<sub>3</sub>CO<sub>2</sub>H at a flow rate of 1.0 mL/min. Purification of ligands was achieved on a Waters 600 HPLC using a reverse phase column (Vydac C18, 15–20 μm, 22 × 250 mm). Peptides were eluted with a linear gradient of CH<sub>3</sub>CN/0.1% CF<sub>3</sub>CO<sub>2</sub>H at a flow rate of 5.0 mL/min. Separation was monitored at 230 and 280 nm. Size exclusion chromatography was performed on a borosilicate glass column (2.6 × 250 mm, Sigma, St. Louis, MO) filled with medium sized Sephadex G-25 or G-10. The compounds were eluted with an isocratic flow of 1.0 M aqueous acetic acid. The pure compounds were dissolved in DI water or DMSO at approximately 1-5 mM concentrations. Accurate concentrations were determined by HPLC at 280 nm. A solution of D-Trp in water or DMSO, accordingly, was co-injected as an internal standard. Structures were characterized by ESI (Finnigan, Thermoquest LCQ ion trap instrument) or MALDI-TOF (Bruker Reflex-III, α-cyanocinnamic acid as a matrix). For internal calibration an

appropriate mixture of standard peptides was used with an average resolution of 8,000–9,000. High resolution mass measurements were carried out on a FT-ICR IonSpec 4.7T instrument.

Structures are provided in **Scheme S2**. Mass spectra and HPLC characterization data are provided in

**Table S1.**

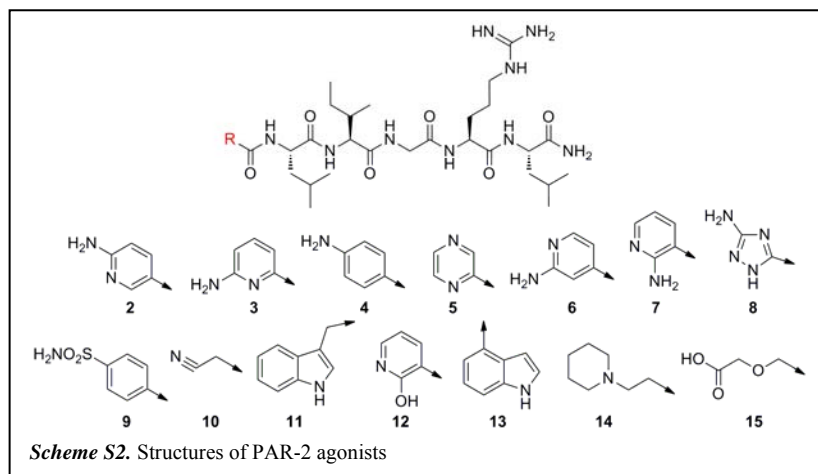

**Table S1:** High resolution mass spectral data and HPLC retention times.

| Compound | Structure                                                                         | Rt<br>(k') | Calculated<br>[MH <sup>+</sup> ] | Exp.<br>[MH <sup>+</sup> ] |
|----------|-----------------------------------------------------------------------------------|------------|----------------------------------|----------------------------|
|          | 2-furoyl-Leu-Ile-Gly-Arg-Leu-Orn(Aloc)-HN <sub>2</sub> ( <b>365</b> )             | 9.9        | 862.5145                         | 862.5142                   |
| 1        | 2-aminothiazo-4-yl-Leu-Ile-Gly-Arg-Leu-HN <sub>2</sub> ( <b>13-4</b> )            | 7.71       | 696.3974                         | 696.3978                   |
| 2        | 6-aminonicotiny-yl-Leu-Ile-Gly-Arg-Leu-HN <sub>2</sub> ( <b>383</b> )             | 6.50       | 690.4410                         | 690.4407                   |
| 3        | 6-aminopyridin-2-yl-Leu-Ile-Gly-Arg-Leu-HN <sub>2</sub> ( <b>13-1</b> )           | 6.81       | 690.4410                         | 690.4                      |
| 4        | 4-aminophenyl-Leu-Ile-Gly-Arg-Leu-HN <sub>2</sub> ( <b>7-05</b> )                 | 7.63       | 689.4457                         | 689.4                      |
| 5        | pyrazin-2-yl -Leu-Ile-Gly-Arg-Leu-HN <sub>2</sub> ( <b>13-2</b> )                 | 8.12       | 676.4253                         | 676.4                      |
| 6        | 6-aminopyridin-4-yl-Leu-Ile-Gly-Arg-Leu-HN <sub>2</sub> ( <b>13-5</b> )           | 6.49       | 690.4410                         | 690.5                      |
| 7        | 6-aminopyridin-5-yl-Leu-Ile-Gly-Arg-Leu-HN <sub>2</sub> ( <b>13-6</b> )           | 6.68       | 690.4410                         | 690.5                      |
| 8        | 3-amino-1H-1,2,4-triazol-5-yl-Leu-Ile-Gly-Arg-Leu-HN <sub>2</sub> ( <b>13-7</b> ) | 6.5        | 680.4315                         | 680.4                      |
| 9        | 4-sulfonamidophenyl-Leu-Ile-Gly-Arg-Leu-HN <sub>2</sub> ( <b>13-7</b> )           | 6.1        | 753.4076                         | 753.4                      |
| 10       | 2-cyanoacetyl-Leu-Ile-Gly-Arg-Leu-Orn(Aloc)-HN <sub>2</sub> ( <b>365</b> )        | 6.7        | 637.4044                         | 637.4                      |

<sup>[a]</sup> Peptide was eluted with a linear MeCN/0.1% CF<sub>3</sub>CO<sub>2</sub>H aqueous gradient (10% to 90% in 30 min) at a flow rate of 0.3 mL/min; Waters XBridge C-18 column (3.0 x 150 mm, 3.5 μm); HPLC k' = (peptide retention time - solvent retention time)/solvent retention time. All the obtained purified peptides showed > 95% purity. <sup>[b]</sup> MS found molecular peaks MH<sup>+</sup>; high resolution Bruker Reflex III MALDI-TOF instrument.

**Table S2.** Ca<sup>2+</sup> mobilization and *in vitro* physiological (RTCA) assays

| R-CO-Leu-Ile-Gly-Arg-Leu-NH <sub>2</sub> <sup>[b]</sup> | [Ca <sup>2+</sup> ] <sub>i</sub> measurements |             |             | xRTCA <sup>[a]</sup>     |                          |
|---------------------------------------------------------|-----------------------------------------------|-------------|-------------|--------------------------|--------------------------|
|                                                         | %<br>100 μM                                   | %<br>10 μM  | %<br>2.5 μM | EC <sub>50</sub><br>(μM) | EC <sub>50</sub><br>(nM) |
| <b>2-furoyl-LIGRL-Orn(Aloc)-NH<sub>2</sub> (365)</b>    | 100 ± 0                                       | 97.8 ± 1.0  | 93.6 ± 3.3  | 0.84 ± 0.08              | 138 ± 13                 |
| 1 <b>2-aminothiazol-4-yl (13-4)</b>                     | 100 ± 0                                       | 96.2 ± 1.4  | 67.5 ± 7.5  | 1.77 ± 0.24              | 142 ± 18                 |
| 2 <b>6-aminonicotinyl (383)</b>                         | 100 ± 0                                       | 93 ± 2.0    | 55 ± 11.6   | 2.60 ± 0.32              | 311 ± 26                 |
| 3 <b>6-aminopyridin-2-yl (13-1)</b>                     | 99.3 ± 0.7                                    | 94.4 ± 2.6  | 27.1 ± 6.9  | 3.50 ± 0.36              | ND                       |
| 4 <b>4-aminophenyl (13-3)</b>                           | 93.0 ± 0.3                                    | 86.9 ± 4.1  | 16.5 ± 5.3  | 6.59 ± 1.7               | ND                       |
| 5 <b>pyrazin-2-yl (13-2)</b>                            | 98.6 ± 1.4                                    | 31.5 ± 25.6 | 0           | ND                       | ND                       |
| 6 <b>6-aminopyridin-4-yl (13-5)</b>                     | 96.1 ± 3.9                                    | 0           | 0           | ND                       | ND                       |
| 7 <b>6-aminopyridin-5-yl (14-1)</b>                     | 98.7 ± 2.2                                    | 86.6 ± 12.1 | 0.6 ± 0.4   | ND                       | ND                       |
| 8 <b>3-amino-1H-1,2,4-triazol-5-yl (14-2)</b>           | 88.4 ± 6.4                                    | 6.0 ± 5.9   | 0           | ND                       | ND                       |
| 9 <b>6-sulfonamidophenyl (5-02I)</b>                    | 88.8 ± 4.3                                    | 0           | 0           | ND                       | ND                       |

<sup>[a]</sup> EC<sub>50</sub> = concentration of compound that was able to generate 50% maximal intracellular activity; values are expressed ± S.E.M. (N ≥ 2 for 100 μM; N ≥ 4 for all others in Ca<sup>2+</sup> assay, data are expressed % response ± S.E.M.; N ≥ 8 in the RTCA assay).

<sup>[b]</sup> the structures do not contain C-terminal Orn as **2-furoyl**-Leu-Ile-Gly-Arg-Leu-Orn(Aloc)-NH<sub>2</sub>. ND = not determined.

## References:

---

- [1] J. Vagner, H. L. Handl, R. J. Gillies, V. J. Hruby, *Bioorg. Med. Chem. Lett.* **2004**, *14*, 211-215.
- [2] H. L. Handl, R. Sankaranarayanan, J. Josan, J. Vagner, E. A. Mash, R. J. Gillies, V. J. Hruby, *Bioconjug. Chem.* **2007**, *18*, 1101-1109.
- [3] V. Krchnak, J. Vagner, and M. Lebl, *Intl. J. Pept. Prot. Res.* **1988**, *32*, 415-421.
- [4] J. Vagner, L. Xu, H.L. Handl, J.S. Josan, D.L. Morse, E.A. Mash, R.J. Gillies, and V.J. Hruby *Angew. Chem. Int. Ed.* 2008, *47*, 1685 –1688
- [5] J.S. Josan, J. Vagner, H.L. Handl, R. Sankaranarayanan, R.J. Gillies, V.J. Hruby *Int. J. Pept. Res. Ther.* (2008) *14*, 93–300.
